# Supplementary material for: Controlled Release of Epigenetically-Enhanced Extracellular Vesicles from a GelMA/Nanoclay Composite Hydrogel to Promote Bone Repair
Source: MDPI journal article supplement (doi:10.3390/ijms23020832), 2022-01-13
Supplement: s1 [file s1]

## Supplementary Materials

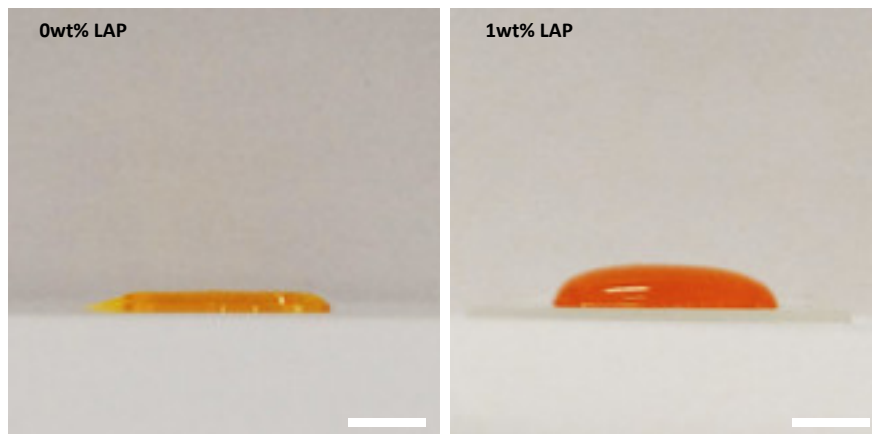

**Supplementary Figure S1. 3D printed GelMA-LAP hydrogel integrity in the z-axis.** GelMA with/without LAP were extruded as filaments (4 layers) to evaluated shape fidelity in the z-axis. Scale bar = 500  $\mu\text{m}$ .

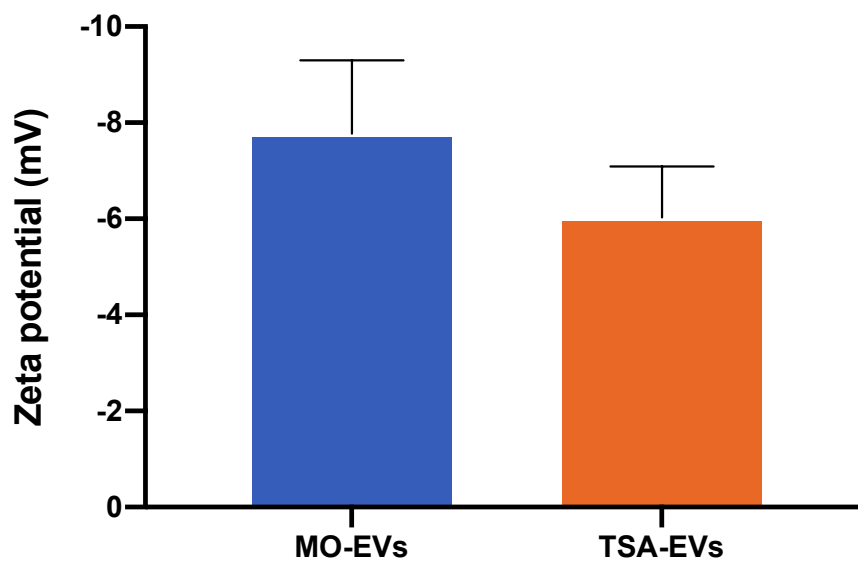

**Supplementary Figure S2. Zeta potential of osteoblast-derived EVs.** Data are expressed as mean  $\pm$  SD (n = 3).

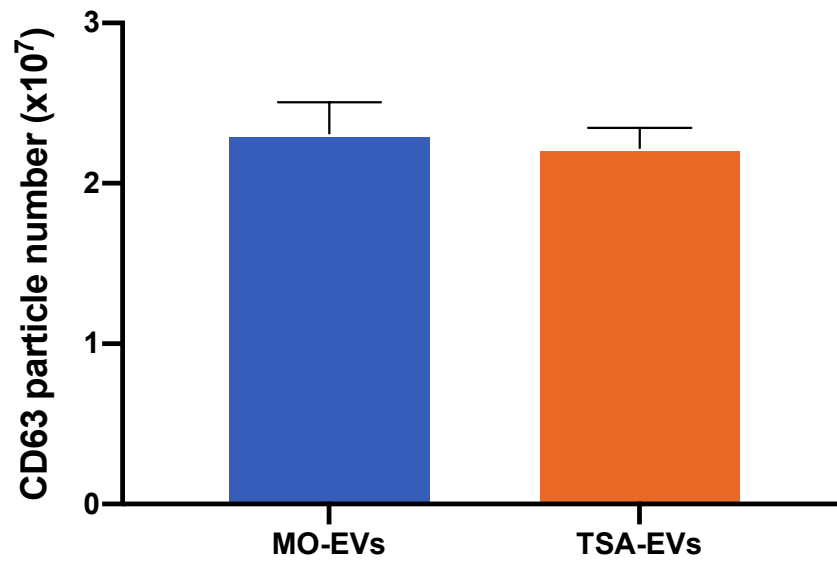

**Supplementary Figure S3. Quantification of CD63 positive particles from TSA-EV or MO-EVs loaded GelMA hydrogel containing 1wt% LAP after 7 days incubation. Data are expressed as mean  $\pm$  SD (n = 3).**
